# Supplementary material for: Design, Synthesis and Gene Modulation Insights into Pigments Derived from Tryptophan-Betaxanthin, Which Act against Tumor Development in Caenorhabditis elegans
Source: MDPI journal article supplement (doi:10.3390/ijms25010063), 2023-12-20
Supplement: s1 [file s1]

## **Supplementary information**

### **Design, Synthesis and Gene Modulation Insights into Pigments Derived from Tryptophan-Betaxanthin, which Acts against Tumor Development in *Caenorhabditis elegans***

Paula Henarejos-Escudero, Fernando F. Méndez-García, Samanta Hernández-García, Pedro Martínez-Rodríguez, and Fernando Gandía-Herrero

Department of Biochemistry and Molecular Biology A, Faculty of Biology, Regional Campus of International Excellence, Campus Mare Nostrum, University of Murcia, Murcia, Spain.

**Table S1.** *In vivo* measurements of tumor size. Statistical analysis: Kruskal-Wallis One Way Analysis of Variance on Ranks

|                                       | [ ]<br>( $\mu$ M) | n   | Tumor<br>Area ( $\mu$ m <sup>2</sup> ) | S.D.    | Reduction<br>(%) | <i>p</i> value vs<br>control |
|---------------------------------------|-------------------|-----|----------------------------------------|---------|------------------|------------------------------|
| Control                               | 25                | 243 | 14395.52                               | 3434.07 | 0.0              |                              |
| L-tryptophan-betaxanthin              | 25                | 89  | 9056.34                                | 2215.15 | -37.0            | <0.001                       |
| D-tryptophan-betaxanthin              | 25                | 78  | 9372.10                                | 1891.74 | -34.9            | <0.001                       |
| DL-tryptophan-betaxanthin             | 25                | 56  | 9247.86                                | 3042.07 | -35.7            | <0.001                       |
| L-tryptophan-6-decarboxy-betaxanthin  | 25                | 89  | 9666.17                                | 2088.68 | -32.9            | <0.001                       |
| Tryptamine-betaxanthin                | 25                | 99  | 8909.07                                | 1944.82 | -38.1            | <0.001                       |
| 5-hydroxy-L-tryptophan-betaxanthin    | 25                | 90  | 9871.99                                | 2605.08 | -31.4            | <0.001                       |
| 5-fluoro-DL-tryptophan-betaxanthin    | 25                | 80  | 9421.97                                | 2309.92 | -34.5            | <0.001                       |
| 5-bromo-DL-tryptophan-betaxanthin     | 25                | 81  | 8657.34                                | 2142.69 | -39.9            | <0.001                       |
| L-tryptophan-benzyl ester-betaxanthin | 25                | 87  | 8256.18                                | 1901.74 | -42.6            | <0.001                       |
| L-tryptophan-methyl ester-betaxanthin | 25                | 75  | 8212.28                                | 1906.22 | -43.0            | <0.001                       |
| Serotonin-betaxanthin                 | 25                | 107 | 9244.04                                | 1564.24 | -35.8            | <0.001                       |

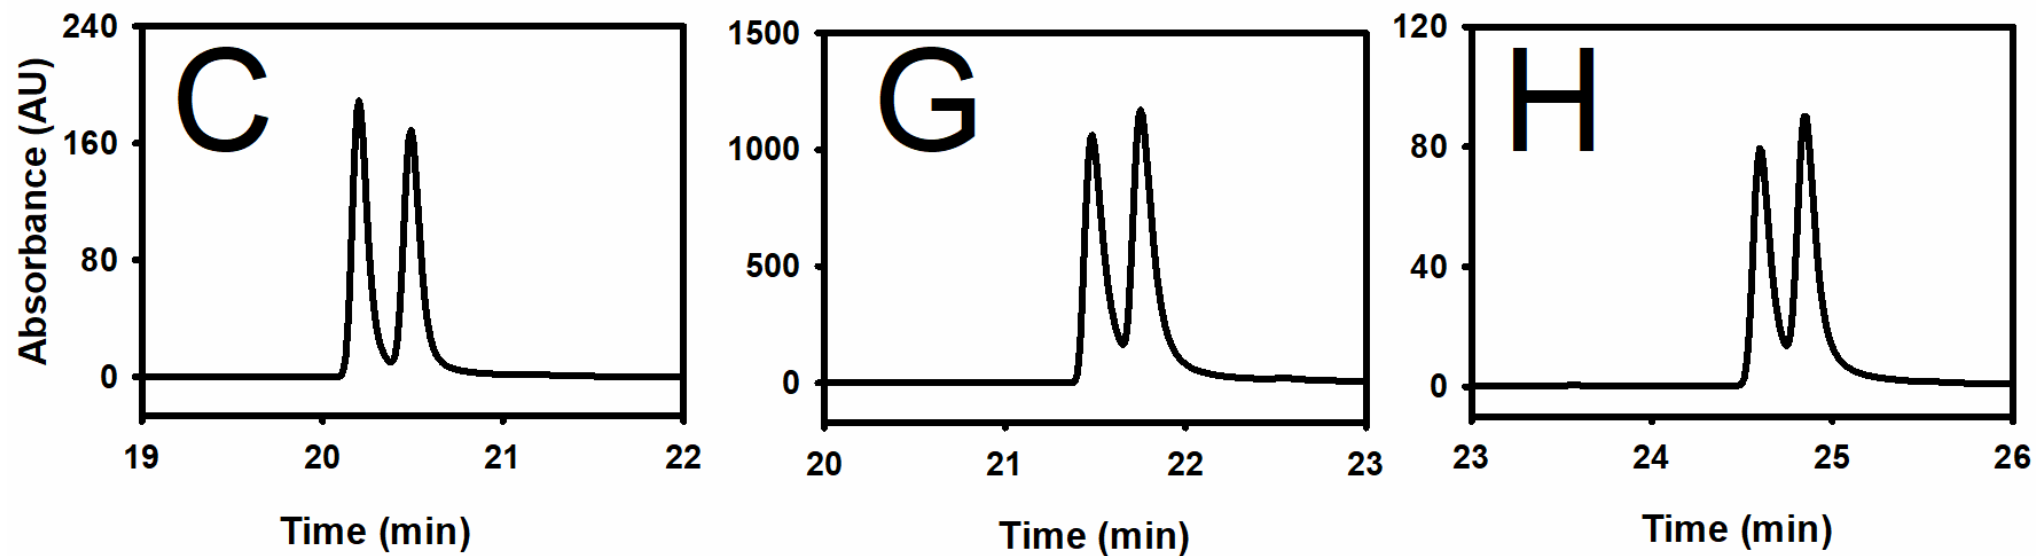

**Fig. S1.** Figure S1. Zoom of the peaks in the HPLC recording of Figure 1 where two peaks corresponding to the diastereoisomeric forms of the pigments derived from the racemic amino acids are shown in panels C, G and H. (C) DL-tryptophan-betaxanthin, (G) 5-fluoro-DL-tryptophan-betaxanthin, (H) 5-bromo-DL-tryptophan-betaxanthin. The injection volume was 50  $\mu$ L.

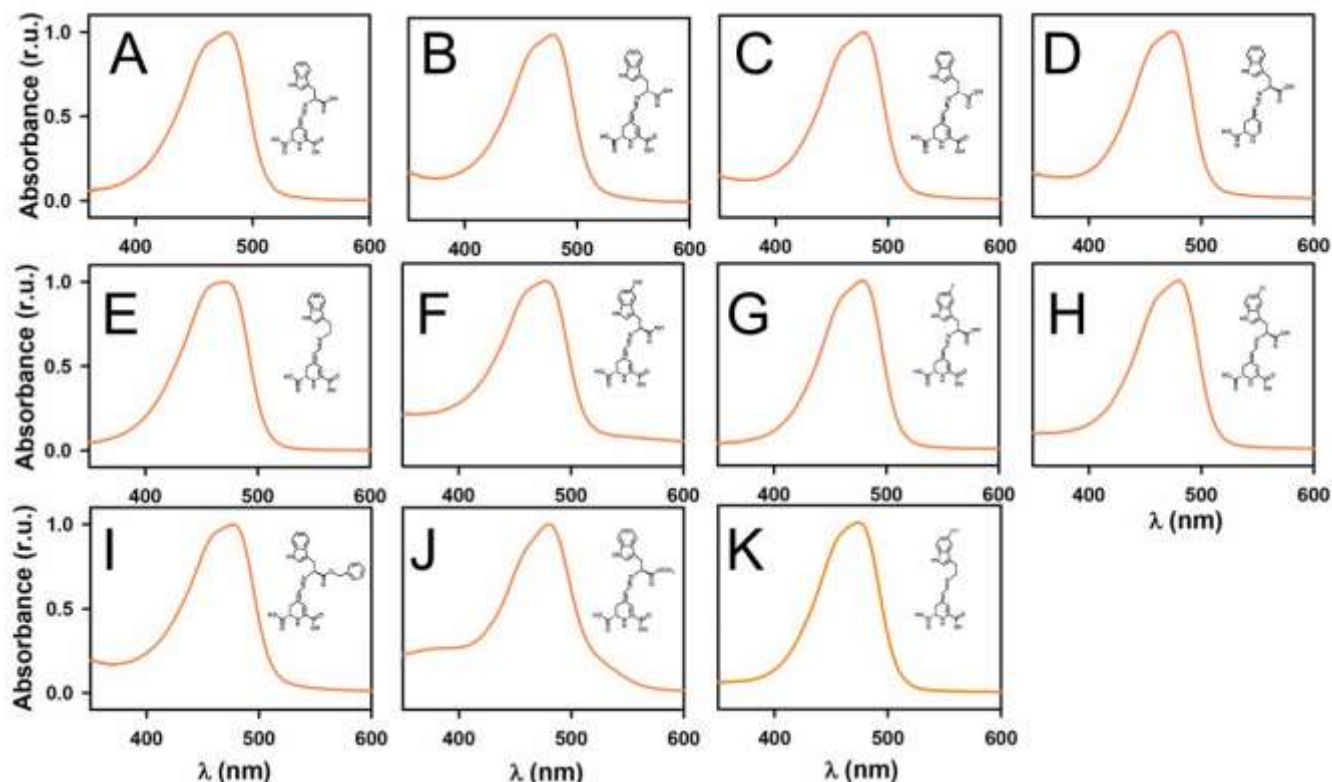

**Fig. S2.** Absorbance spectra for all the tryptophan-derived betaxanthins considered in this study. (A) L-tryptophan-betaxanthin, (B) D-tryptophan-betaxanthin, (C) DL-tryptophan-betaxanthin, (D) L-tryptophan-6-decarboxy-betaxanthin, (E) tryptamine-betaxanthin, (F) 5-hydroxy-L-tryptophan-betaxanthin, (G) 5-fluoro-DL-tryptophan-betaxanthin, (H) 5-bromo-DL-tryptophan-betaxanthin, (I) L-tryptophan-benzyl ester-betaxanthin, (J) L-tryptophan methyl ester-betaxanthin, and (K) serotonin-betaxanthin. r.u. relative units. Pigment structures are shown inset.

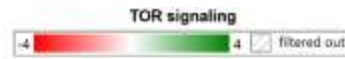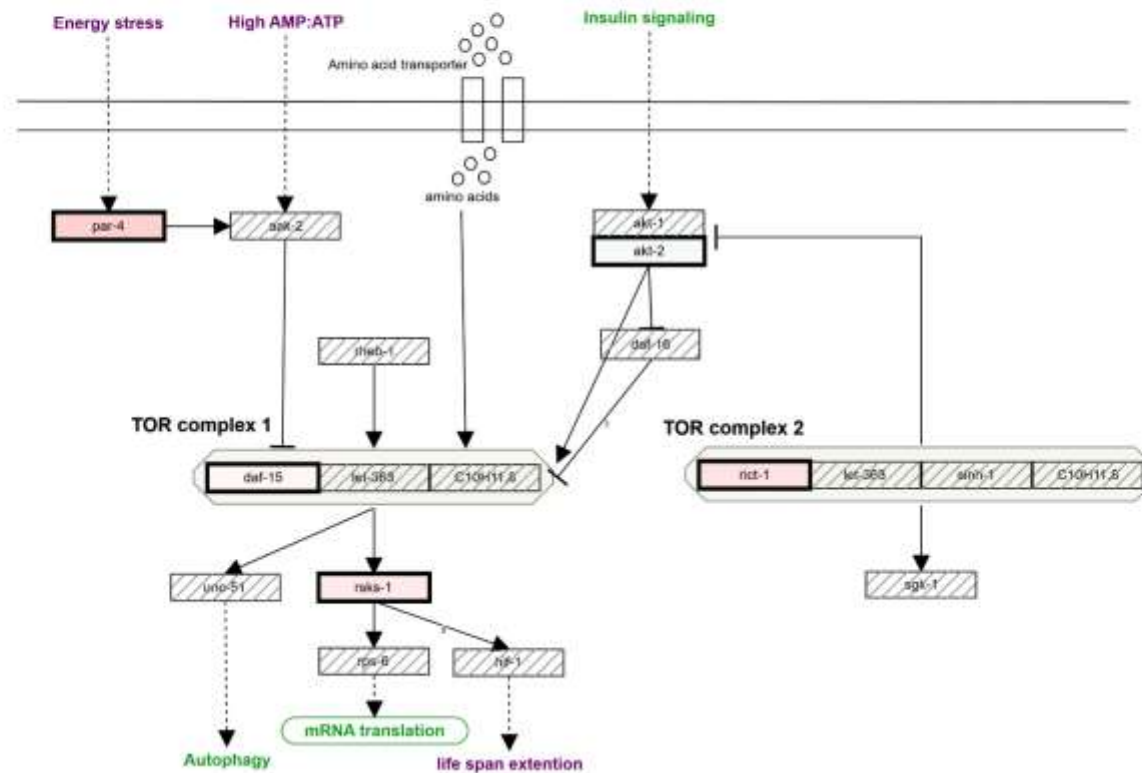

**Fig. S3.** Differential expression of mTOR pathway genes between tryptophan benzyl ester-betaxanthin and control treatments.

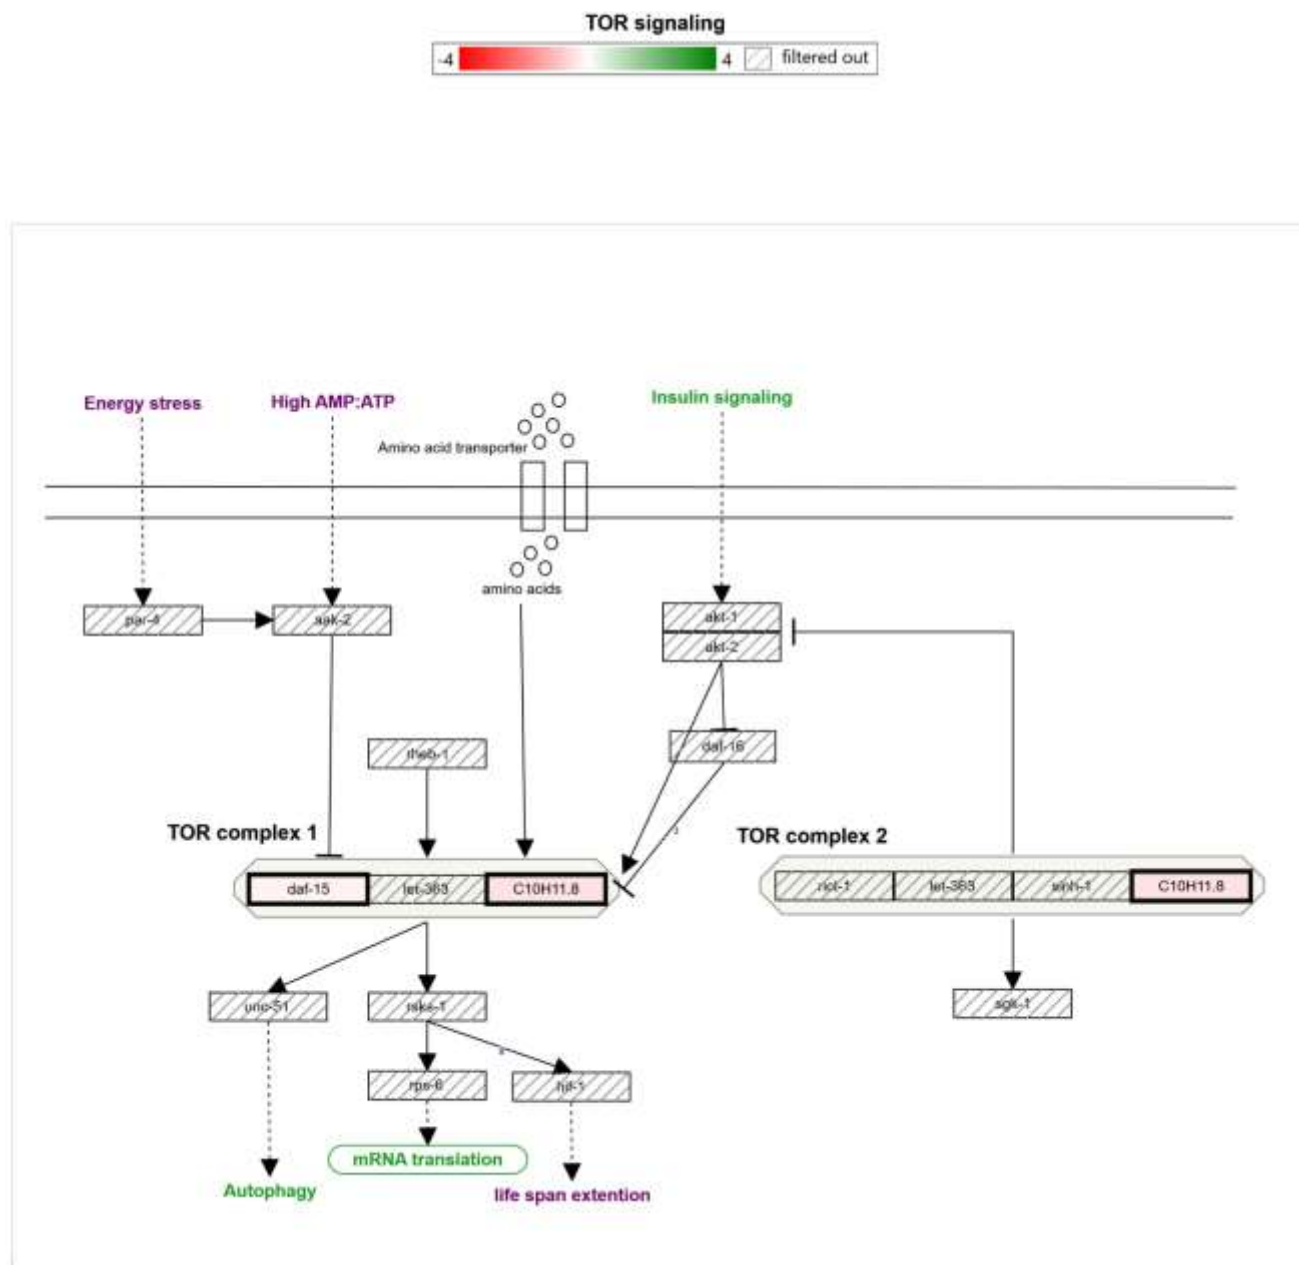

**Fig. S4.** Differential expression of mTOR pathway genes between tryptophan methyl ester-betaxanthin and control treatments.

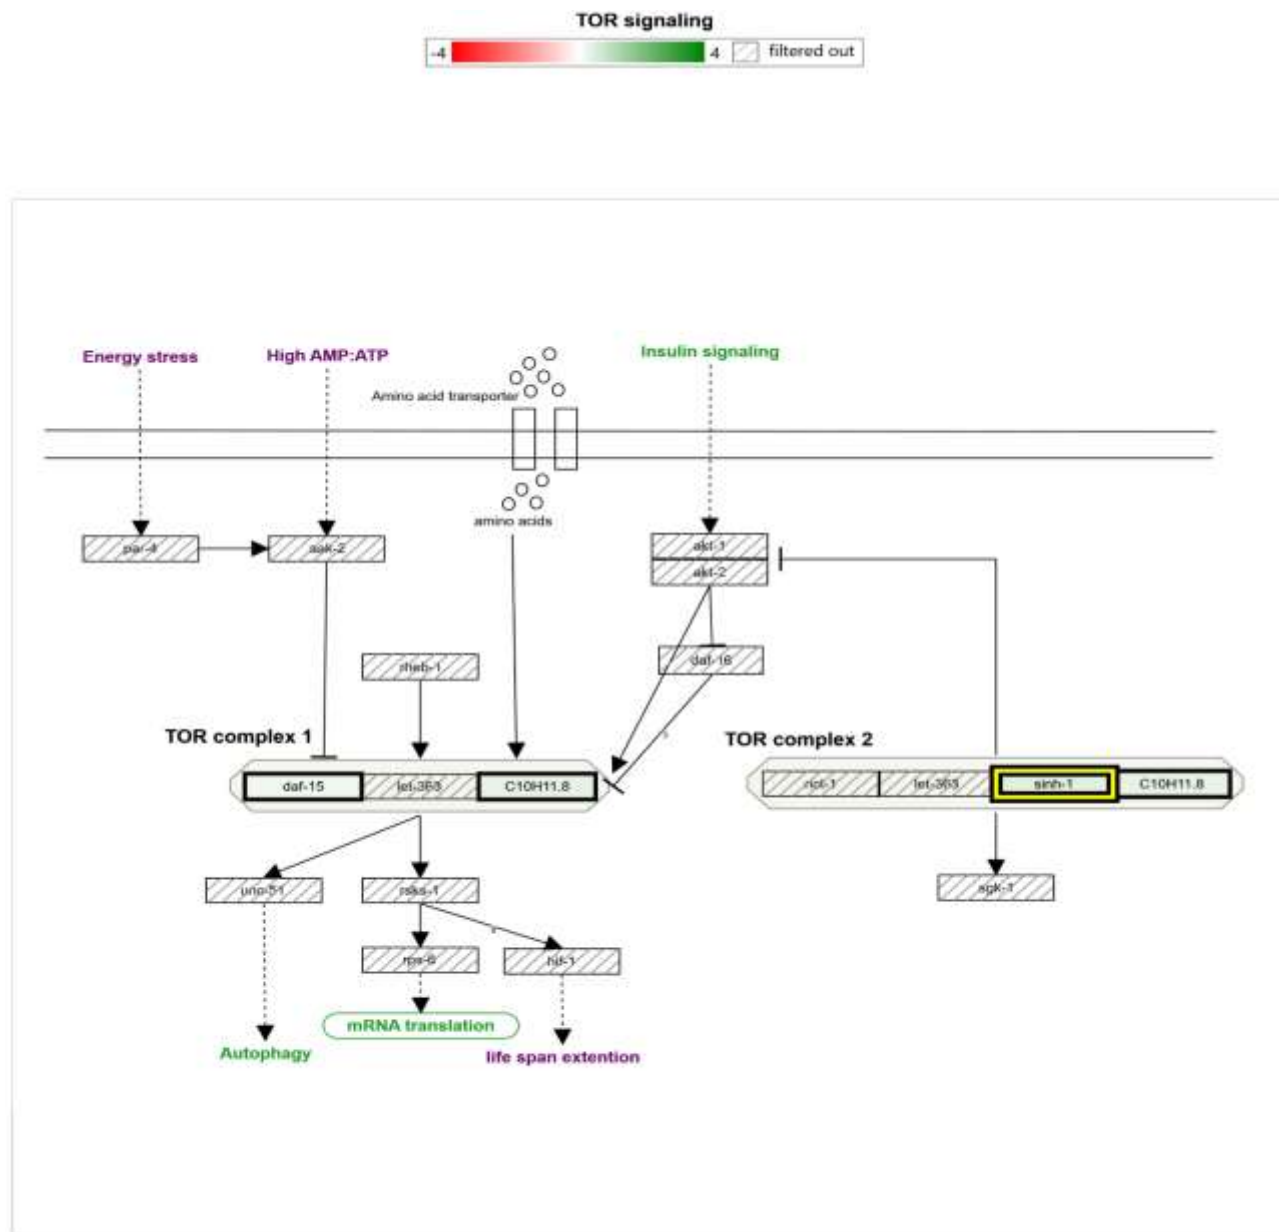

**Fig. S5.** Differential expression of mTOR pathway genes between JK1466 strain and N2 strain.
